# Supplementary material for: Angiogenesis-on-a-chip coupled with single-cell RNA sequencing reveals spatially differential activations of autophagy along angiogenic sprouts
Source: Springer Nature journal article supplement (doi:10.1038/s41467-023-44427-0), 2024-01-03
Supplement: 41467_2023_44427_MOESM2_ESM.pdf [file 41467_2023_44427_MOESM2_ESM.pdf]

## **Description of additional supplementary files**

**Supplementary Data 1.** List of genes included in P1-4 or FP\_P1-4. **(A)** The 1,301 genes included in the P1-4. **(B)** The 512 genes included in the FP\_P1-4. See the excel file entitled “Supplementary Data 1”.
